# Supplementary material
Source: Springer Nature journal article supplement (https://www.springermedizin.de/resource/supplementary/12911_2009_312_MOESM3_ESM.pdf/9525452)
Supplement: MOESM3 [file 9525452]

LAGRE NY DIAGNOSE LAGRE ENDRING I DIAGNOSE TILBAKE

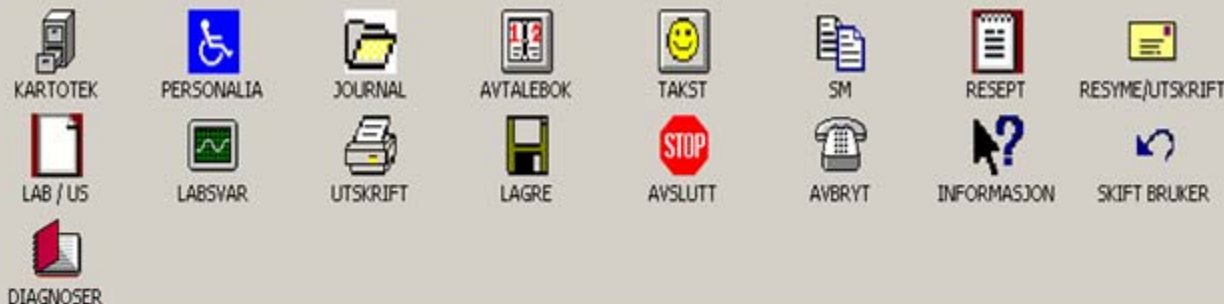

**DIAGNOSENAVN**

Cystitt akutt

**KODE**

U71

- Blære spreg
- Blære symptomer/plager IKA
- Blæredivertikkel
- Blæreforstyrrelse INA
- Blærehalsstenose/obstruksjon
- Blæreinnskrumpning
- Blærekatar INA
- Blæreruptur
- Blæresten
- Blæresvikt nevrogen
- Blæretenesme
- Carunculus urethrae
- Cystitt akutt**
- Cystitt klamydiainfeksjon
- Cystitt kronisk
- Cystitt kronisk interstiell
- Cystitt/urinveisinfeksjon IKA INA
- Detrusorhyperrefleksi IKA
- Divertikulitt blære
- Dysuri

- Allment og uspesifisert
- Blod
- Endokrine, metabolske, ernær forh
- Fordøyelsesorganer
- Hjerte-karsystemet
- Hud
- Kvinnelige kjønnsorganer/bryster
- Luftveier
- Månnlige kjønnsorganer/bryster
- Muskel-skjelettsystemet
- Nervesystemet
- OVERSETT DIAGNOSER
- Psykisk
- Sosialt
- Svangerskap/fødsel/familieplanlegg
- Urinveier**
- Øre
- Øye
